# Supplementary material for: A legacy of kings : the story of Rockingham forest
Source: MDPI journal article supplement (doi:10.3390/foods12203867), 2005-06-01
Supplement: s1 [file s1]

## SUPPLEMENTARY MATERIAL

**Table S1.** Temperature variation in the UAE from BRP.

| <b>t (min)</b> | <b>A (%)</b> | <b>ΔT (°C)</b> |
|----------------|--------------|----------------|
| 2              | 20           | 34.5 ± 0.7     |
| 2              | 60           | 43.5 ± 2.1     |
| 2              | 100          | 52.0 ± 0.0     |
| 4              | 20           | 37.5 ± 0.7     |
| 4              | 60           | 51.5 ± 3.5     |
| 4              | 100          | 67.5 ± 0.7     |
| 6              | 20           | 39.0 ± 0.0     |
| 6              | 60           | 61.5 ± 0.7     |
| 6              | 100          | 80.0 ± 0.0     |
| 8              | 20           | 42.5 ± 3.5     |
| 8              | 60           | 65.0 ± 2.8     |
| 10             | 20           | 45.5 ± 0.7     |
| 10             | 60           | 70.0 ± 0.0     |

A: ultrasonic amplitude; ΔT: temperature variation.

**Table S2.** Energy variation in the UAE from BRP.

| <b>A (%)</b> | <b>Energy (Wh)</b>           |          |          |          |          |          |          |          |          |           |
|--------------|------------------------------|----------|----------|----------|----------|----------|----------|----------|----------|-----------|
|              | <b>Extraction time (min)</b> |          |          |          |          |          |          |          |          |           |
|              | <b>1</b>                     | <b>2</b> | <b>3</b> | <b>4</b> | <b>5</b> | <b>6</b> | <b>7</b> | <b>8</b> | <b>9</b> | <b>10</b> |
| <b>20</b>    | 0.423                        | 0.843    |          |          |          |          |          |          |          |           |
| <b>60</b>    | 1.425                        | 2.741    |          |          |          |          |          |          |          |           |
| <b>100</b>   | 2.402                        | 4.605    |          |          |          |          |          |          |          |           |
| <b>20</b>    | 0.416                        | 0.832    | 1.254    | 1.658    |          |          |          |          |          |           |
| <b>60</b>    | 1.417                        | 2.738    | 3.933    | 5.011    |          |          |          |          |          |           |
| <b>100</b>   | 2.378                        | 4.576    | 6.531    | 8.210    |          |          |          |          |          |           |
| <b>20</b>    | 0.416                        | 0.852    | 1.244    | 1.663    | 2.075    | 2.491    |          |          |          |           |
| <b>60</b>    | 1.433                        | 2.739    | 3.891    | 4.941    | 5.895    | 6.814    |          |          |          |           |
| <b>100</b>   | 2.339                        | 4.488    | 6.376    | 7.849    | 9.131    | 10.399   |          |          |          |           |
| <b>20</b>    | 0.412                        | 0.830    | 1.246    | 1.656    | 2.065    | 2.473    | 2.881    | 3.290    |          |           |
| <b>60</b>    | 1.378                        | 2.651    | 3.827    | 4.889    | 5.815    | 6.685    | 7.545    | 8.292    |          |           |
| <b>20</b>    | 0.420                        | 0.836    | 1.248    | 1.658    | 2.068    | 2.477    | 2.836    | 3.304    | 3.693    | 4.097     |
| <b>60</b>    | 1.429                        | 2.717    | 3.935    | 5.042    | 6.030    | 6.862    | 7.790    | 8.632    | 9.474    | 10.267    |
